# Supplementary material for: Catalytic oxidation of benzene over ruthenium–cobalt bimetallic catalysts and study of its mechanism
Source: Royal Society of Chemistry journal article supplement (doi:10.1039/c6cy02141g), 2016-11-28
Supplement: c6cy02141g1.pdf [file c6cy02141g1.pdf]

## Supporting Information

### Catalytic oxidation of benzene over ruthenium-cobalt bimetallic catalysts and the mechanism study

Xiaolong Liu<sup>a,\*</sup>, Junlin Zeng<sup>a</sup>, Wenbo Shi<sup>a,b</sup>, Jian Wang<sup>a</sup>, Tingyu Zhu<sup>a,c,\*</sup>, Yunfa Chen<sup>a</sup>

<sup>a</sup>Beijing Engineering Research Center of Process Pollution Control, National Engineering Laboratory for Hydrometallurgical Cleaner Production Technology, Institute of Process Engineering, Chinese Academy of Sciences, Beijing 100190, China

<sup>b</sup>State Key Laboratory of Heavy Oil Processing, China University of Petroleum (Beijing), Beijing 102249, China

<sup>c</sup>Center for Excellence in Regional Atmospheric Environment, Institute of Urban Environment, Chinese Academy of Sciences, Xiamen 361021, China

(\*) Corresponding author. Tel./Fax: +86-10-82544821.

E-mail address: liuxl@ipe.ac.cn (Xiaolong Liu); tyzhu@ipe.ac.cn (Tingyu Zhu)

#### Contents

1. The characterizations and evaluations data for various samples
2. The XPS data
3. CO<sub>2</sub> selectivity of benzene oxidation over Ru-5Co/TiO<sub>2</sub>
4. The TEM images
5. *In-situ FTIR* study

**Table S1.** The characterizations and evaluations data for various samples

| Catalyst                  | Ru content<br>(wt.%) <sup>a</sup> | S <sub>BET</sub><br>(m <sup>2</sup> /g) | T <sub>50</sub><br>(°C) | T <sub>90</sub><br>(°C) |
|---------------------------|-----------------------------------|-----------------------------------------|-------------------------|-------------------------|
| Ru/TiO <sub>2</sub>       | 1 (1.01)                          | 52.34                                   | 221                     | 229                     |
| Ru-1Co/TiO <sub>2</sub>   | 1 (1.02)                          | 51.91                                   | 212                     | 220                     |
| Ru-3Co/TiO <sub>2</sub>   | 1 (1.04)                          | 51.62                                   | 219                     | 227                     |
| Ru-5Co/TiO <sub>2</sub>   | 1 (1.01)                          | 51.23                                   | 204                     | 215                     |
| Ru-10Co/TiO <sub>2</sub>  | 1(1.03)                           | 50.01                                   | 217                     | 225                     |
| 5Co-Ru/TiO <sub>2</sub>   | 1 (1.00)                          | 51.07                                   | 219                     | 227                     |
| (Ru-5Co)/TiO <sub>2</sub> | 1 (0.97)                          | 51.32                                   | 218                     | 227                     |

<sup>a</sup> The data in parenthesis show the values measured by ICP-OES.

**Table S2.** The XPS data for the bimetallic Ru-Co catalysts.

| Catalyst                  | Ru <sub>cus</sub><br>(At. %) | Ru <sub>cus</sub> +O <sub>ot</sub><br>(At. %) | Ru <sup>4+</sup><br>(At. %) | Co (At.<br>%) | Ru/Co | O <sub>ads</sub> /O <sub>latt</sub> |
|---------------------------|------------------------------|-----------------------------------------------|-----------------------------|---------------|-------|-------------------------------------|
| Ru-1Co/TiO <sub>2</sub>   | 0.211                        | 0.103                                         | 0.122                       | 0.663         | 0.778 | 0.083                               |
| Ru-3Co/TiO <sub>2</sub>   | 0.216                        | 0.099                                         | 0.131                       | 0.926         | 0.482 | 0.065                               |
| Ru-5Co/TiO <sub>2</sub>   | 0.243                        | 0.141                                         | 0.125                       | 0.639         | 0.796 | 0.116                               |
| Ru-10Co/TiO <sub>2</sub>  | 0.171                        | 0.095                                         | 0.101                       | 1.009         | 0.364 | 0.073                               |
| 5Co-Ru/TiO <sub>2</sub>   | 0.197                        | 0.068                                         | 0.112                       | 1.078         | 0.349 | 0.071                               |
| (Ru-5Co)/TiO <sub>2</sub> | 0.178                        | 0.11                                          | 0.096                       | 1.095         | 0.351 | 0.071                               |

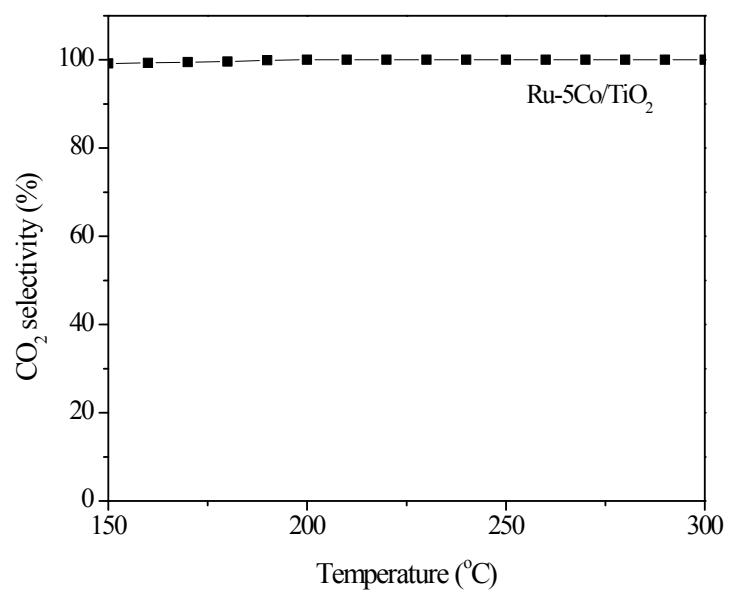

**Fig. S1.** CO<sub>2</sub> selectivity of benzene oxidation over Ru-5Co/TiO<sub>2</sub>.

In the catalytic oxidation of benzene over Ru-5Co/TiO<sub>2</sub>, organic byproducts were not observed by GC. Hence, the CO<sub>2</sub> selectivity was calculated using the equation:  $CO_2 \text{ selectivity} = [C(CO_2)/(C(CO_2) + C(CO))]$ . The CO<sub>2</sub> selectivity was above 99% within the temperature range of 150-300 °C due to the high oxidation efficiency of Ru-5Co/TiO<sub>2</sub>.

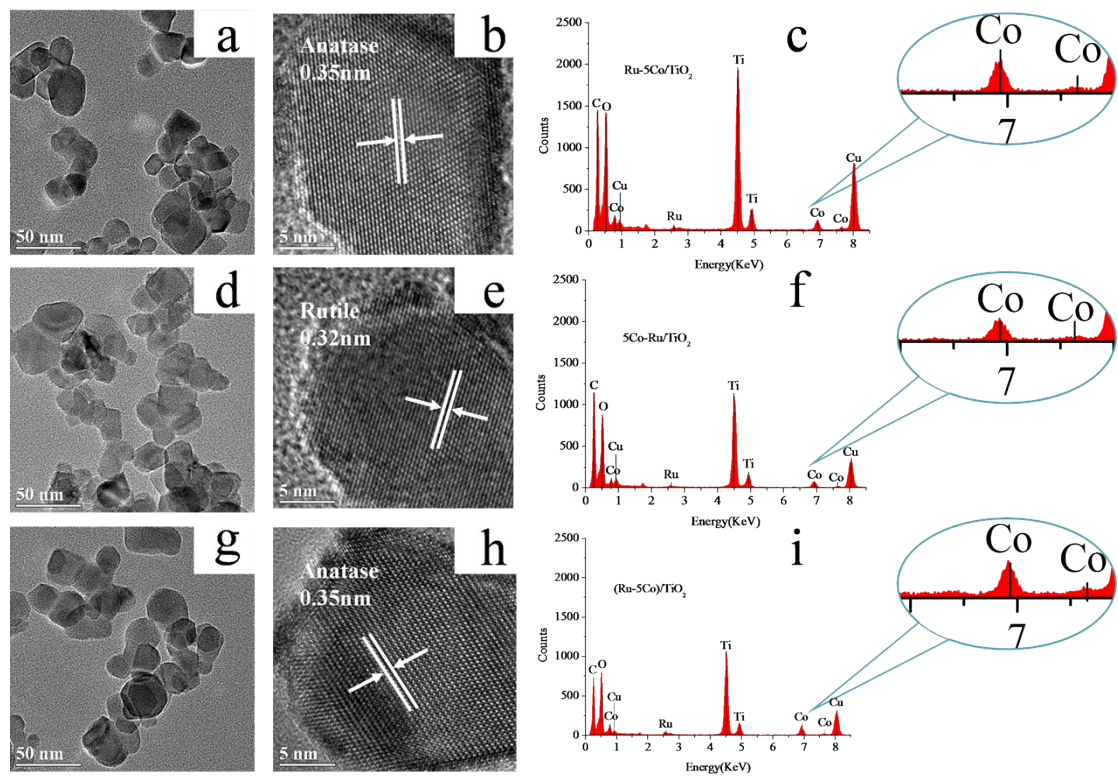

**Fig. S2.** TEM, HR-TEM, and EDX images for (a-c) Ru-5Co/TiO<sub>2</sub>, (d-f) 5Co-Ru/TiO<sub>2</sub>, and (Ru-

5Co)/TiO<sub>2</sub>, respectively

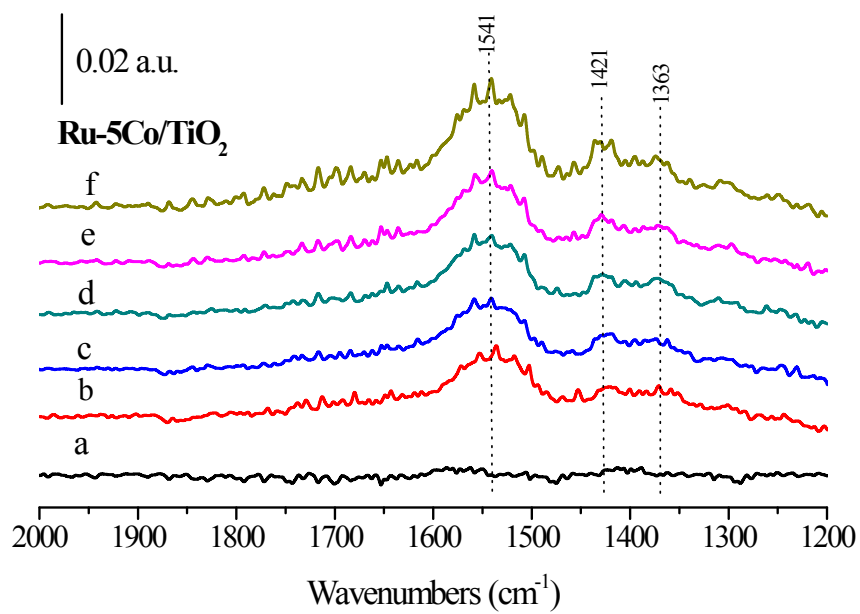

**Fig. S3.** *In-situ* FTIR spectra for Ru-5Co/TiO<sub>2</sub> collected at 240 °C after (a) 1, (b) 3, (c) 10, (d) 20, (e) 30, (f) 60 min on 500 ppm benzene/Ar stream.
